# Supplementary material for: Engineering a predatory bacterium as a proficient killer agent for intracellular bio-products recovery: The case of the polyhydroxyalkanoates
Source: PubMed Central journal article supplement (PMC4834554; doi:10.1038/srep24381), 2016-04-18
Supplement: srep24381-s1.pdf [file srep24381-s1.pdf]

## SUPPLEMENTARY INFORMATION FOR

### **Engineering a predatory bacterium as a proficient killer agent for intracellular bio-products recovery: The case of the polyhydroxyalkanoates**

Virginia Martínez<sup>1,3+</sup>, Cristina Herencias<sup>1+</sup>, Edouard Jurkevitch<sup>2</sup> and M. Auxiliadora Prieto<sup>1\*</sup>

<sup>1</sup>Environmental Biology Department, Centro de Investigaciones Biológicas, CSIC, C/ Ramiro de Maeztu 9, 28040 Madrid, Spain.<sup>1</sup>

<sup>2</sup>Department of Plant Pathology and Microbiology, Faculty of Agricultural, Food and Environmental Quality Sciences, the Hebrew University of Jerusalem, Rehovot 76100, Israel.

<sup>3</sup>Present address: V. Martínez, Novo Nordisk Foundation Center for Biosustainability, Technical University of Denmark, Hørsholm, Denmark.

\*Corresponding author.

Mailing address: Department of Environmental Biology, Centro de Investigaciones Biológicas, CSIC, C/ Ramiro de Maeztu 9, 28040 Madrid, Spain.<sup>1</sup>

E-mail: [auxi@cib.csic.es](mailto:auxi@cib.csic.es)

Tel: +34 918 373 112; Fax: +34 915 360 432.

<sup>+</sup>Both authors contributed equally to this work.

**Supplementary Table 1. Bacterial strains, plasmids and oligonucleotides used in this study.**

| Strain, plasmid or oligonucleotide | Genotype, description or sequence (5' to 3')                                                                                                          | Reference                 |
|------------------------------------|-------------------------------------------------------------------------------------------------------------------------------------------------------|---------------------------|
| <b>Strain</b>                      |                                                                                                                                                       |                           |
| <b><i>B. bacteriovorus</i></b>     |                                                                                                                                                       |                           |
| HD100                              | Type strain, genome sequenced                                                                                                                         | 1,2                       |
| Bd3709                             | <i>Bd3709</i> ::pK18 <i>mob</i> mutant, HD100 derivative strain                                                                                       | This work                 |
| Bd2637                             | $\Delta$ <i>Bd2637</i> mutant, HD100 derivative strain                                                                                                | This work                 |
| <b><i>C. necator</i> H16</b>       |                                                                                                                                                       |                           |
|                                    | Wild-type                                                                                                                                             | 3                         |
| <b><i>E. coli</i></b>              |                                                                                                                                                       |                           |
| ML35                               | <i>E. coli</i> B, <i>lacYI</i> -                                                                                                                      | Jurkevitch lab collection |
| S17- $\lambda$ <i>pir</i>          | <i>Tra</i> <sup>+</sup> <i>recA pro thi hsdR chr::RP4-2</i>                                                                                           | 4                         |
| <b><i>P. putida</i></b>            |                                                                                                                                                       |                           |
| KT2440                             | <i>P. putida</i> mt-2 without TOL plasmid, <i>hsdR</i>                                                                                                | 5                         |
| KT42Z                              | <i>phaZ</i> disruptional mutant, Km <sup>r</sup> , KT2442 derivative strain                                                                           | 6                         |
| <b>Plasmid</b>                     |                                                                                                                                                       |                           |
| pACYC184                           | p15A, Cm <sup>R</sup> , Tet <sup>R</sup>                                                                                                              | 8                         |
| pAV1                               | pACYC184 derivative containing PHB biosynthetic genes ( <i>phbABC</i> ) from <i>C. necator</i> H16, Cm <sup>R</sup>                                   | Prieto lab collection     |
| pK18 <i>mobsacB</i>                | Km <sup>R</sup> , ColE <i>oriV</i> , Mob <sup>+</sup> , <i>lacZa</i> , <i>sacB</i> ; vector for allelic exchange homologous recombination mutagenesis | 9                         |
| pK18 <i>mobsacB</i> -2637          | pK18 <i>mobsacB</i> derivative used for Bd2637 deletion                                                                                               | This work                 |
| pK18 <i>mob</i>                    | <i>oriColE1</i> Mob <sup>+</sup> <i>lacZa</i> <sup>+</sup> , Km <sup>R</sup> used for direct insertional disruption                                   | 9                         |
| pK18 <i>mob</i> -3709              | pK18 <i>mob</i> derivative used for Bd3709 disruption                                                                                                 | This work                 |
| <b>Oligonucleotide<sup>a</sup></b> |                                                                                                                                                       |                           |
| PHB-F                              | <u>GCTCTAGAG</u> ACGTCCCAACCACCTCTTGAA                                                                                                                | This work                 |
| PHB-IR                             | CGGGATCCGGTGACCTCCTGATGAAGAAATCA                                                                                                                      | This work                 |
| PHB-IF                             | CGGGATCCTGATTACGTCAGCAAATCCGG                                                                                                                         | This work                 |
| PHB-R                              | CCCAAGCTTGTGTGAAACAGATTGCGCCC                                                                                                                         | This work                 |
| PHO-F                              | <u>GCTCTAGAG</u> GAGCTTCTCCAGCCATTCGTGA                                                                                                               | This work                 |
|                                    | CGAGC                                                                                                                                                 |                           |
| PHO-R                              | CCCAAGCTTCGGGATGACCCACGGTCATTC                                                                                                                        | This work                 |

<sup>a</sup> Engineered endonuclease sites in the oligonucleotides are shown underlined.

**Supplementary Table 2. Molecular characterization of mcl-PHA and PHB polymers.**

| Strain              | Mn (kDa)      | Mw (kDa)       | PDI         |
|---------------------|---------------|----------------|-------------|
| KT2440 control      | 53.37 ± 7.54  | 100.37 ± 6.81  | 1.89 ± 0.13 |
| HD100/KT2440        | 50.71 ± 4.48  | 96.41 ± 16.30  | 1.89 ± 0.16 |
| Bd3709/KT2440       | 76.56 ± 11.30 | 124.80 ± 25.48 | 1.62 ± 0.15 |
| HD100/KT42Z         | 82.57 ± 10.56 | 42.78 ± 10.32  | 1.73 ± 0.14 |
| Bd3709/KT42Z        | 57.98 ± 6.59  | 88.57 ± 9.56   | 1.53 ± 0.13 |
| ML35 (pAV1) control | 2000 ± 300    | 3000 ± 200     | 1.8 ± 0.3   |
| HD100/ML35 (pAV1)   | 600 ± 40      | 1060 ± 5       | 1.8 ± 0.1   |
| Bd2637/ML35 (pAV1)  | 1000 ± 100    | 2000 ± 300     | 1.7 ± 0.1   |

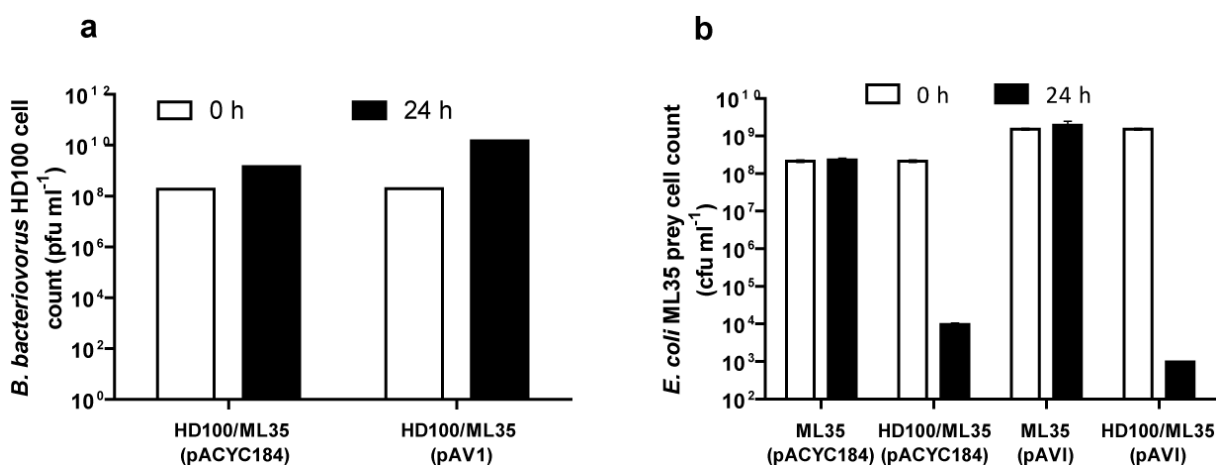

**Supplementary Figure 1. Influence of prey PHB content on fitness of *B. bacteriovorus* HD100.** (a) Number of viable cells of *B. bacteriovorus* HD100 at the start of the experiment (time zero) and after 24 h preying upon *E. coli* ML35 cells accumulating PHB [ML35 (pAV1)] or devoid of it [ML35 (pACYC184)], previously adjusted to 0.3 g l<sup>-1</sup> of residual biomass. (b) Number of viable cells of *E. coli* ML35 accumulating PHB [ML35 (pAV1)] or devoid of it [ML35 (pACYC184)] at the start of the experiment (time zero) and after 24 h of predation with *B. bacteriovorus* HD100.

**Supplementary movies:**

**Movie 1.** *B. bacteriovorus* Bd3709 mutant preying on PHA-accumulating *P. putida* KT2440 at the onset of predation (time zero).

**Movie 2.** *B. bacteriovorus* Bd3709 mutant preying on PHA-accumulating *P. putida* KT2440 after 24 h of predation.

### Supplementary references

1. Stolp, H. & Starr, M. P. *Bdellovibrio bacteriovorus* Gen. et Sp. n., a predatory, ectoparasitic, and bacteriolytic microorganism. *Antonie Van Leeuwenhoek* **29**, 217–248 (1963).
2. Rendulic, S. *et al.* A predator unmasked: life cycle of *Bdellovibrio bacteriovorus* from a genomic perspective. *Science* **303**, 689–692 (2004).
3. Poehlein, A., Kusian, B., Friedrich, B., Daniel, R. & Bowien, B. Complete genome sequence of the type strain *Cupriavidus necator* N-1. *J. Bacteriol.* **193**, 5017 (2011).
4. Simon, R., Priefer, U. & Pühler, A. A broad host range mobilization system for *in vivo* genetic engineering: transposon mutagenesis in gram-negative bacteria. *Nat. Biotechnol.* **1**, 784–791 (1983).
5. Bagdasarian, M. *et al.* Specific-purpose plasmid cloning vectors. II. Broad host range, high copy number, RSF1010-derived vectors for gene cloning in *Pseudomonas*. *Gene* **16**, 237–247 (1981).
6. de Eugenio, L.I. *et al.* Biochemical evidence that *phaZ* gene encodes a specific intracellular medium chain length polyhydroxyalkanoate depolymerase in *Pseudomonas putida* KT2442: characterization of a paradigmatic enzyme. *J. Biol. Chem.* **282**, 4951–4962 (2007).
7. Chang, A. C. Y., & Cohen, S. N. Construction and characterization of amplifiable multicopy DNA cloning vehicles derived from the P15A cryptic miniplasmid. *J. Bacteriol.* **134**, 1141–1156 (1978).
8. Schäfer, A. *et al.* Small mobilizable multi-purpose cloning vectors derived from the *Escherichia coli* plasmids pK18 and pK19: selection of defined deletions in the chromosome of *Corynebacterium glutamicum*. *Gene* **145**, 69–73 (1994).
